# Supplementary material
Source: PubMed Central journal article supplement (PMC3717550)

# 5-HTTLPR (Dominant Model) LnOR (95% CI)

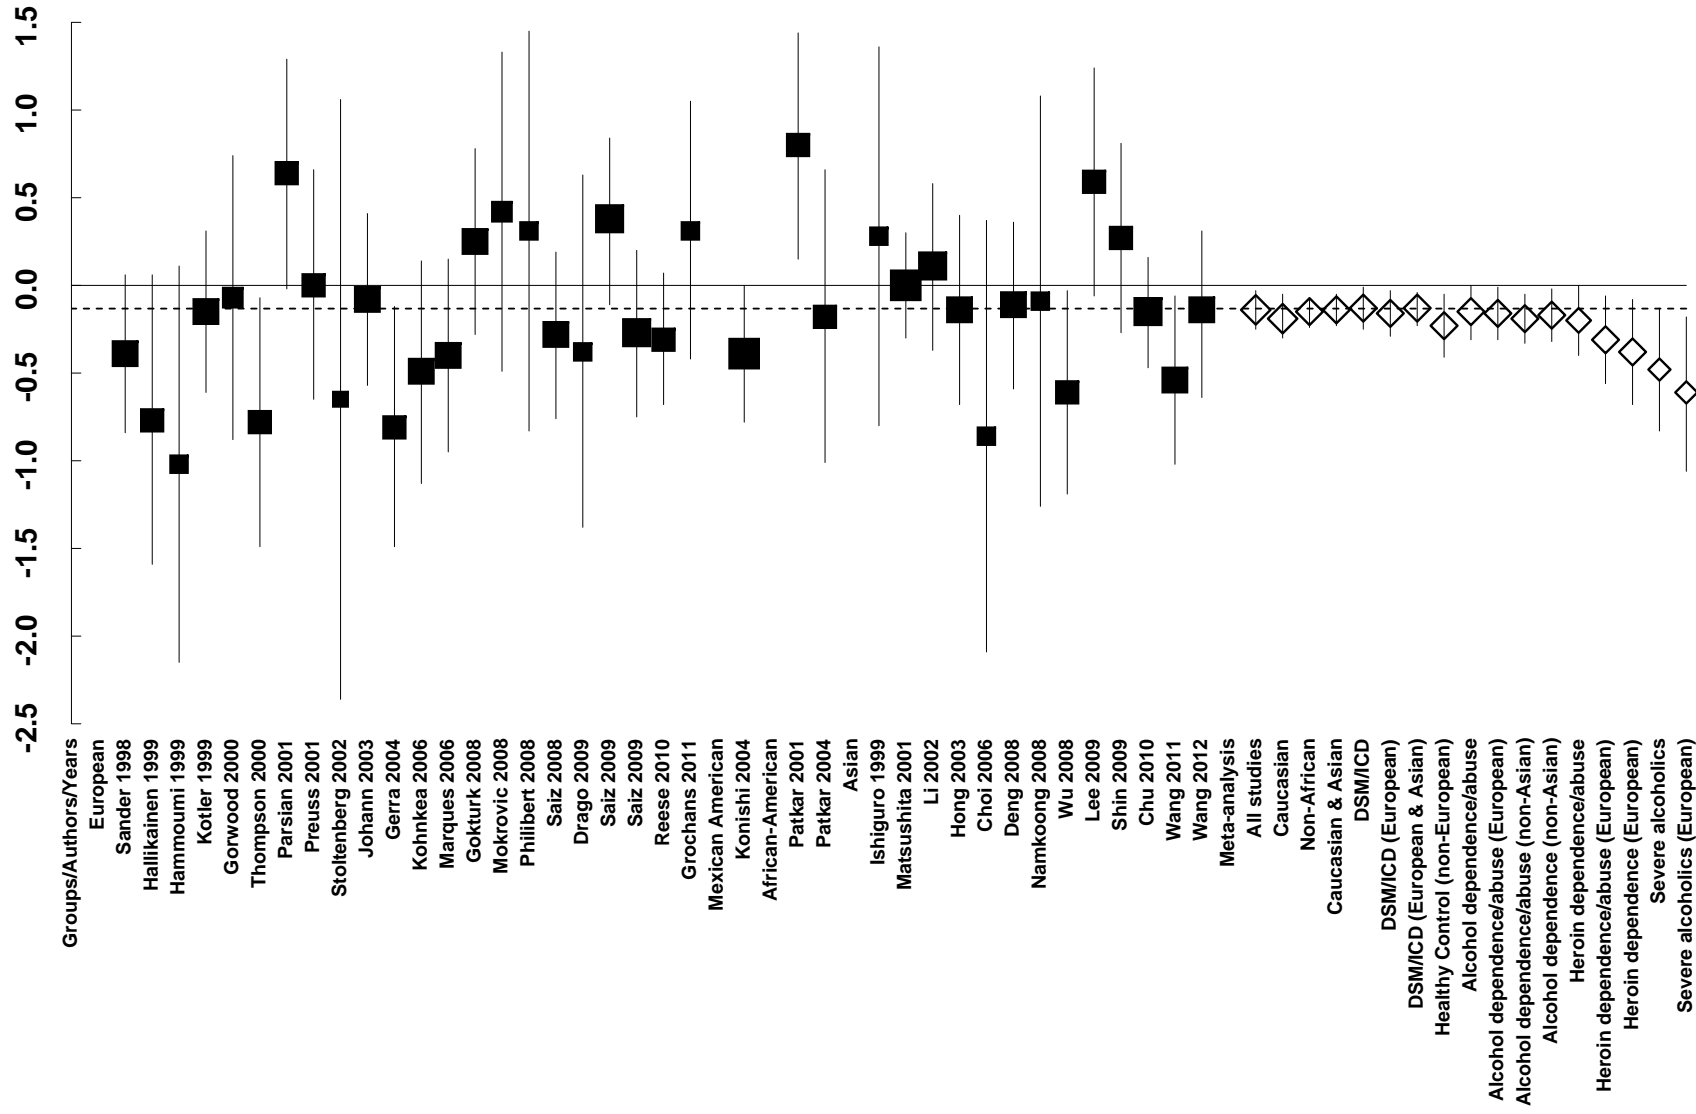

Supplement: npp201373x1.pdf [file npp201373x1.pdf]

### 5-HTTLPR for Alcohol Dependence/Abuse (Dominant Model)

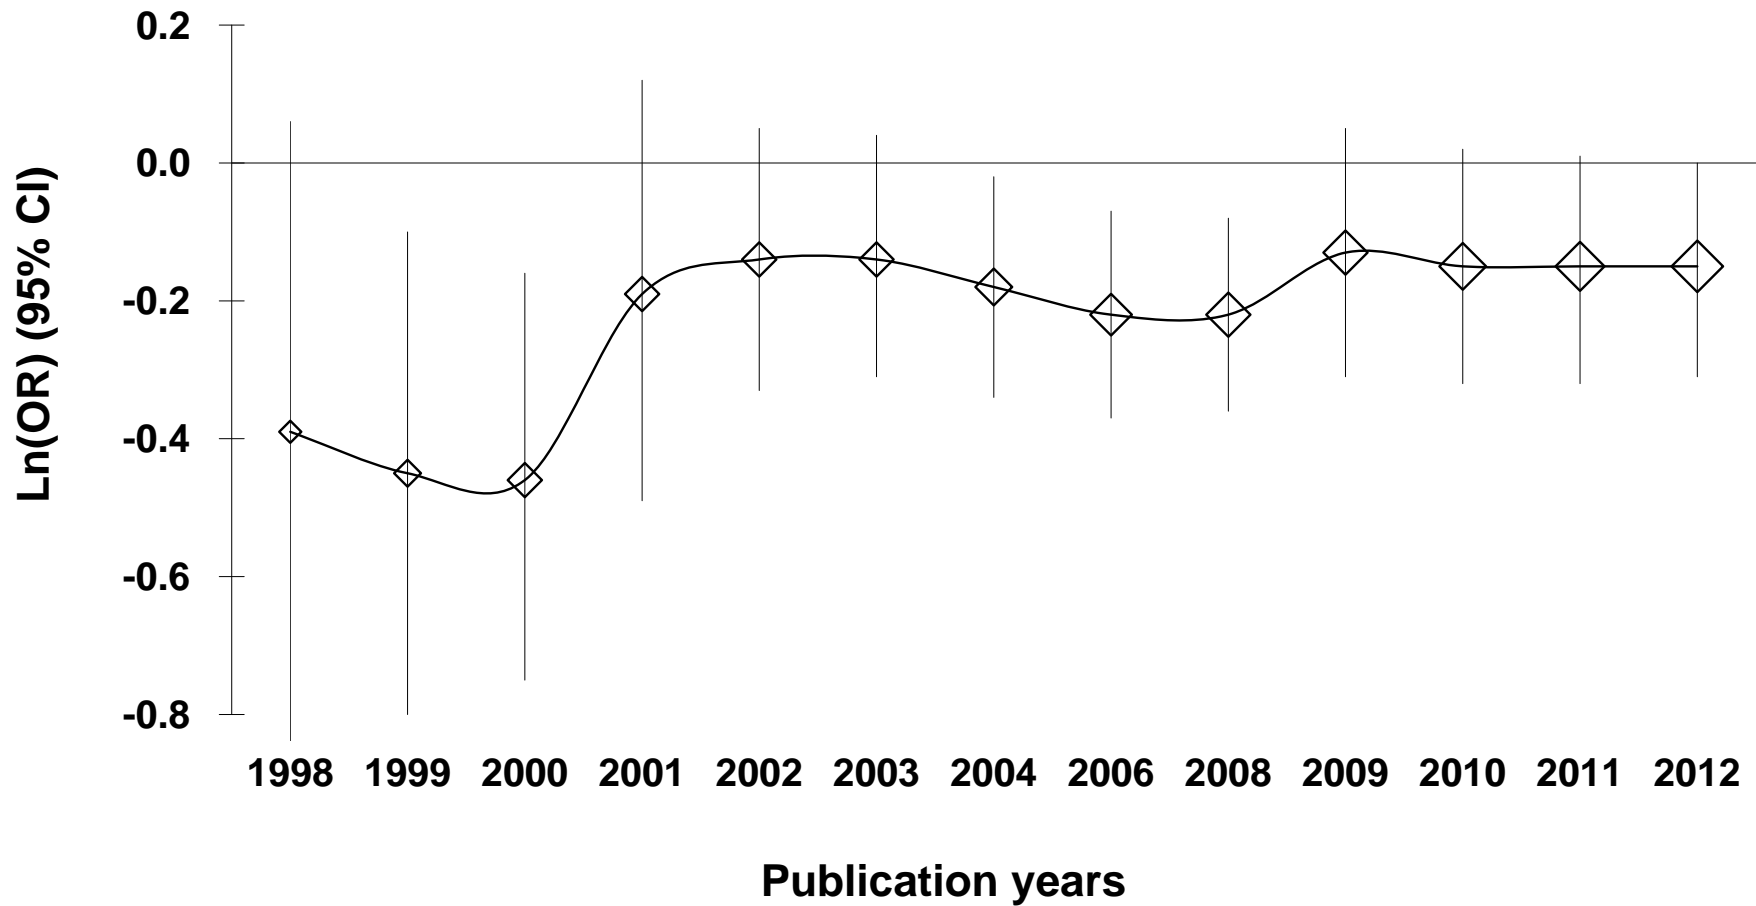

Supplement: npp201373x10.pdf [file npp201373x10.pdf]

### 5-HTTLPR for Combined European, Asian & Mexican Populations (Dominant Model)

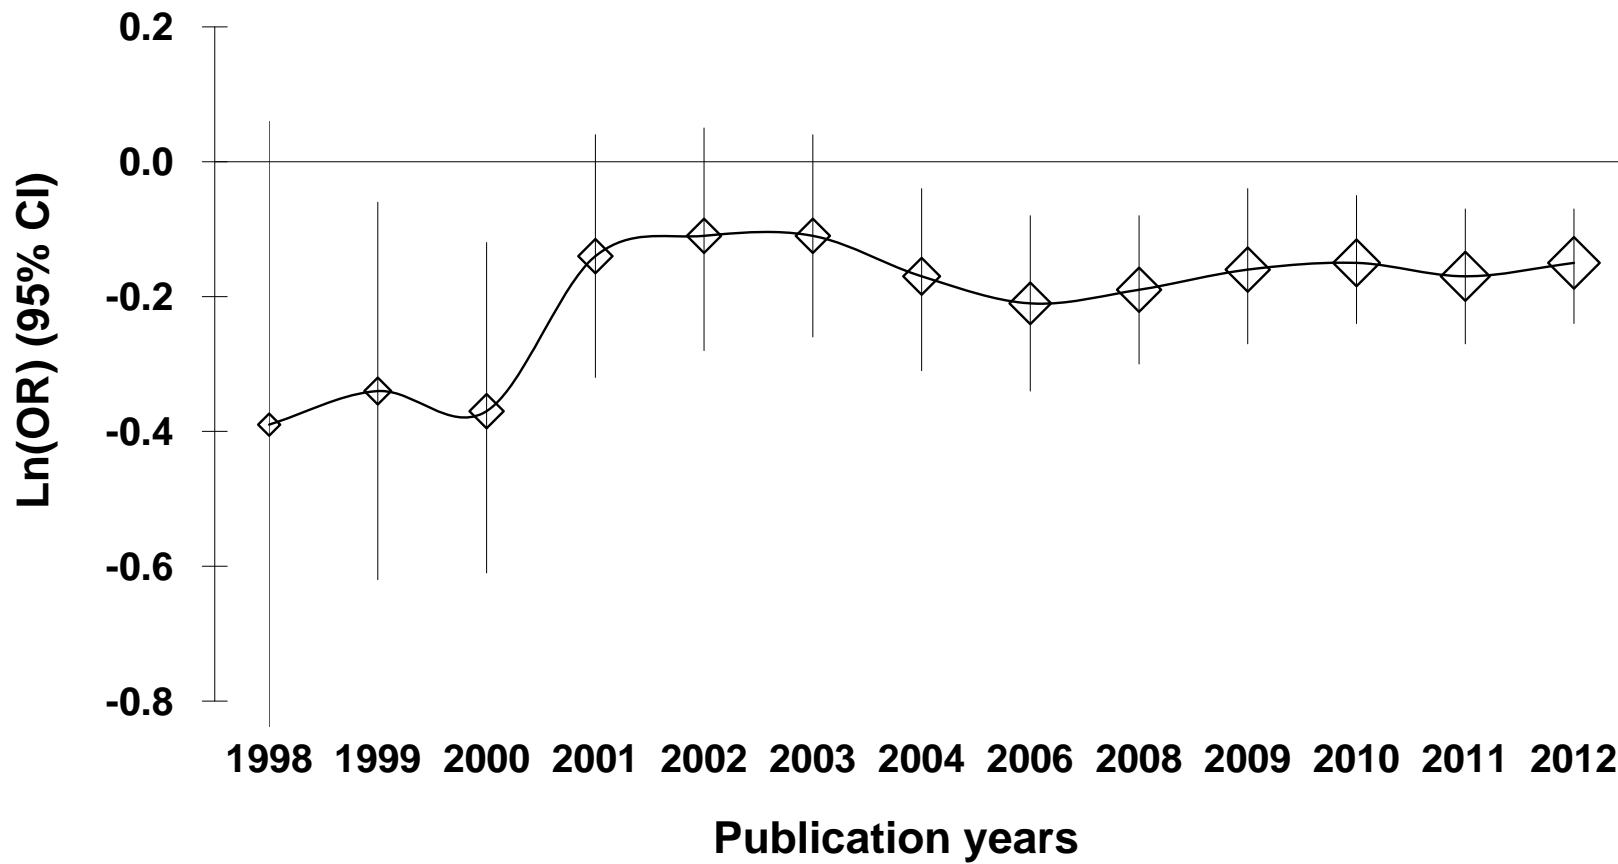

Supplement: npp201373x11.pdf [file npp201373x11.pdf]

### 5-HTTLPR for Alcohol Dependence/Abuse (Allelic Analysis)

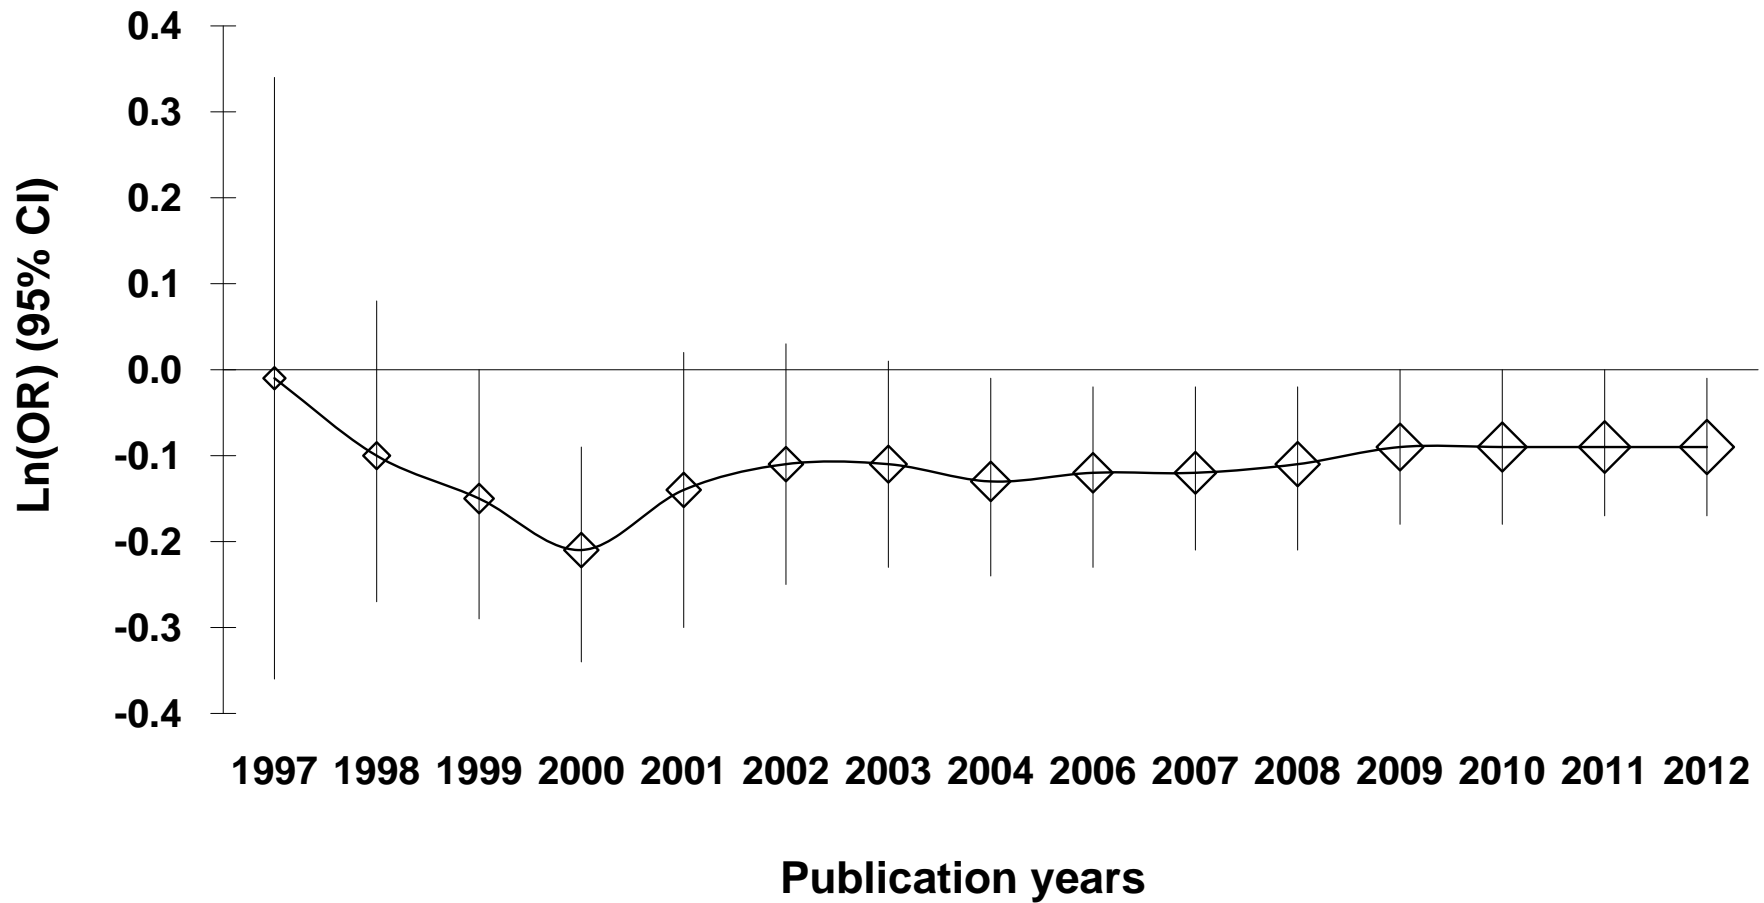

Supplement: npp201373x9.pdf [file npp201373x9.pdf]
